# Supplementary material for: Design, Synthesis and Characterization of Novel Co-Polymers Decorated with Peptides for the Selective Nanoparticle Transport across the Cerebral Endothelium
Source: MDPI journal article supplement (doi:10.3390/molecules23071655), 2018-07-06
Supplement: s1 [file s1]

## Supplementary materials

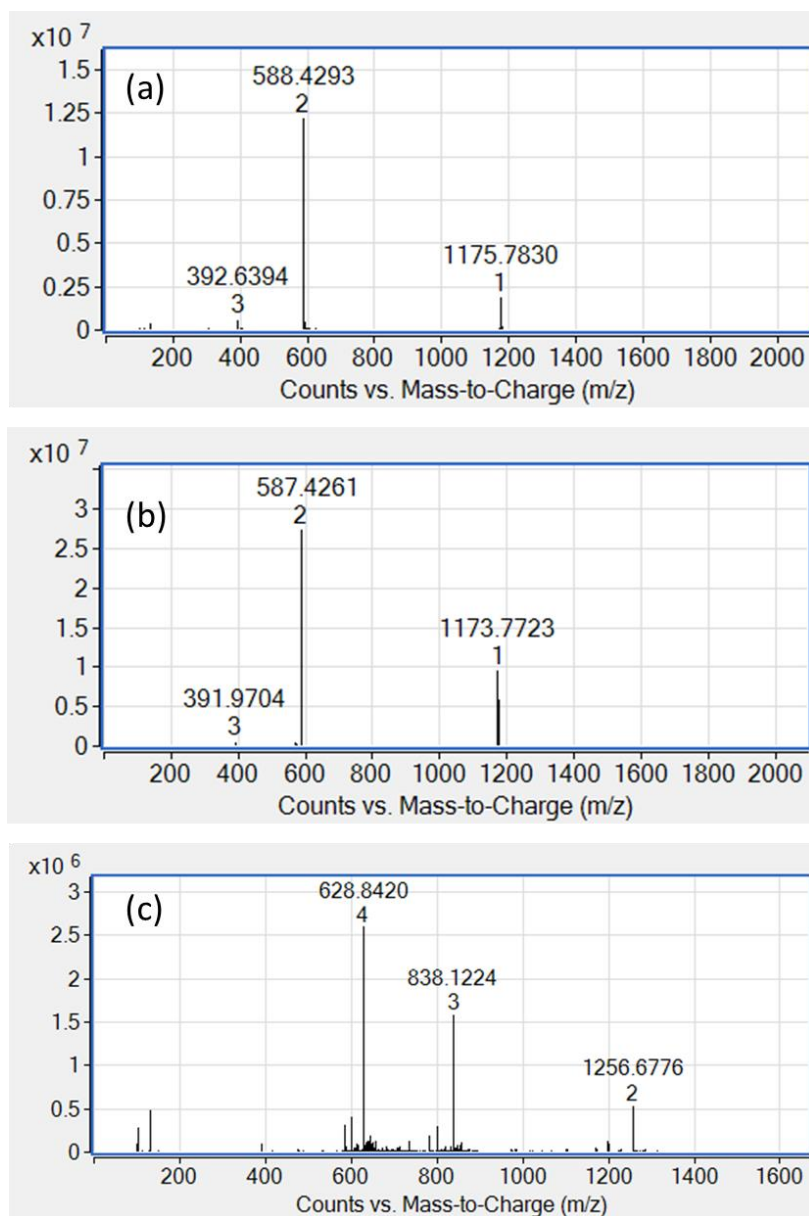

Figure S1: ESI-LC-MS characterization of CRT (a), cyclic CRT (b), gH (c) peptide.
